# Supplementary material
Source: PubMed Central journal article supplement (PMC65031)

Calmodulin Staining

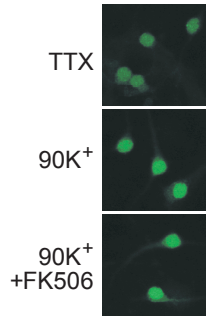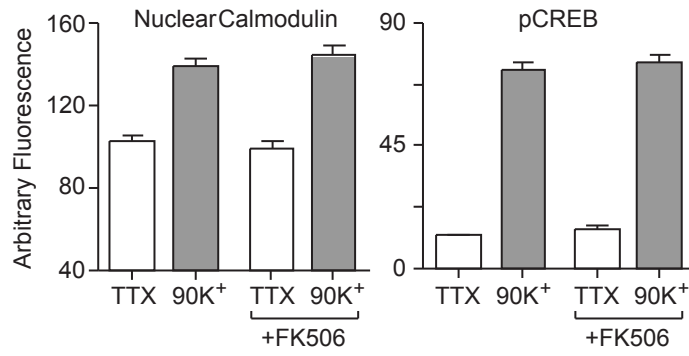

Supplement: pnas_211563998_5.pdf [file pnas_211563998_5.pdf]

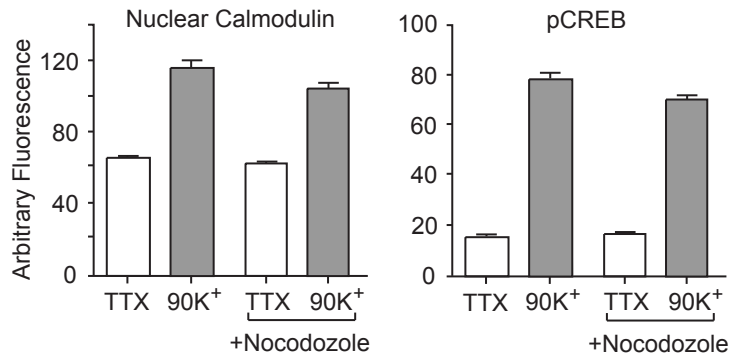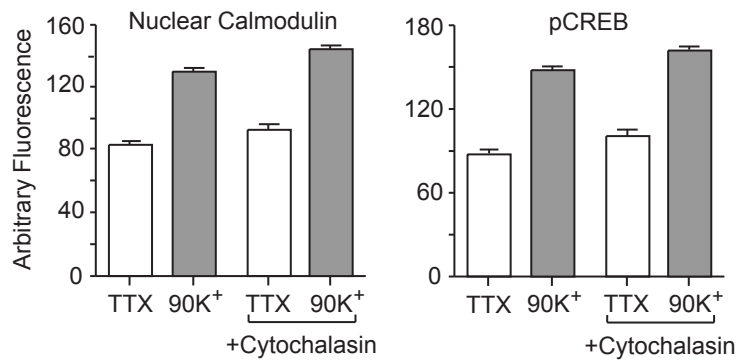

Supplement: pnas_211563998_6.pdf [file pnas_211563998_6.pdf]

Calmodulin Staining

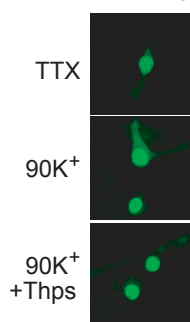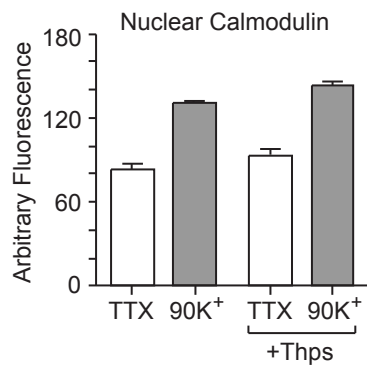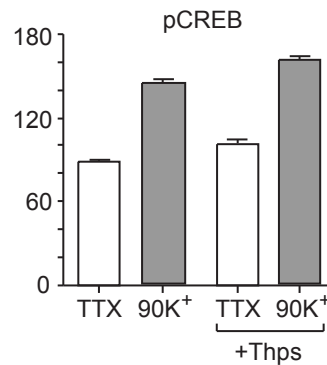

Supplement: pnas_211563998_7.pdf [file pnas_211563998_7.pdf]
